# Supplementary material for: Transfer of metals from soil to vegetables and possible health risk assessment
Source: PubMed Central journal article supplement (PMC3755813; doi:10.1186/2193-1801-2-385), 2013-08-15

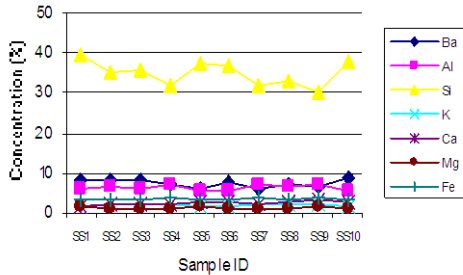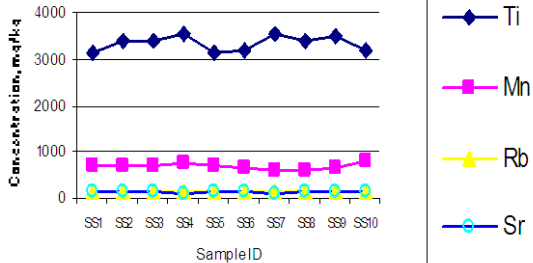

Supplement: 40064_2013_459_MOESM2_ESM.pdf [file 40064_2013_459_MOESM2_ESM.pdf]
